# Supplementary material for: The Adam family metalloprotease Kuzbanian regulates the cleavage of the roundabout receptor to control axon repulsion at the midline
Source: Oxford University Press journal article supplement (doi:10.1242/dev.047993), 2010-06-22
Supplement: dev047993tables1.pdf [file dev047993tables1.pdf]

**Table S1. Genetic interactions between *kuz*, *slit* and *robo***

| <b>A. Fas II axon guidance defects</b>                                                 |                                                  |                     |    |     |                          |                                          |                                          |                              |
|----------------------------------------------------------------------------------------|--------------------------------------------------|---------------------|----|-----|--------------------------|------------------------------------------|------------------------------------------|------------------------------|
| Genotype                                                                               | Number of segments scored (embryos) <sup>1</sup> | +                   | ++ | +++ | FasII axon circling      | % of FasII crossing defects <sup>2</sup> | % of FasII circling defects <sup>3</sup> | Statistics (unpaired t-test) |
| <i>w<sup>1118</sup></i>                                                                | 110 (10)                                         | 0                   | 0  | 0   | 0                        | 0                                        | 0                                        | –                            |
| <i>kuz<sup>H143</sup>/+</i>                                                            | 66 (6)                                           | 0                   | 0  | 0   | 0                        | 0                                        | 0                                        | –                            |
| <i>slit<sup>1</sup>, robo<sup>5</sup>/+</i>                                            | 132 (12)                                         | 9                   | 19 | 2   | 0                        | 22.7                                     | 0                                        | –                            |
| <i>slit<sup>1</sup>, robo<sup>5</sup>/+, kuz<sup>H143</sup></i>                        | 143 (13)                                         | 27                  | 39 | 8   | ND                       | 51.7                                     | ND                                       | <i>P</i> <0.0001             |
| <i>slit<sup>1</sup>, robo<sup>5</sup>/+, kuz<sup>H12</sup></i>                         | 143 (13)                                         | 23                  | 42 | 18  | ND                       | 58                                       | ND                                       | <i>P</i> <0.0001             |
| <i>slit<sup>1</sup>, robo<sup>5</sup>/+, kuz<sup>e29</sup></i>                         | 154 (14)                                         | 21                  | 50 | 36  | ND                       | 69.5                                     | ND                                       | <i>P</i> <0.0001             |
| <i>kuz<sup>H143</sup></i>                                                              | 110 (10)                                         | ND                  | ND | ND  | 4                        | 50                                       | 3.6                                      | –                            |
| <i>kuz<sup>e29</sup></i>                                                               | 77 (7)                                           | ND                  | ND | ND  | 2                        | 76.6                                     | 2.6                                      | –                            |
| <i>slit<sup>1</sup>, robo<sup>5</sup>, kuz<sup>H143</sup>/+, +, kuz<sup>H143</sup></i> | 110 (10)                                         | ND                  | ND | ND  | 31                       | 100                                      | 28.2                                     | <i>P</i> <0.0011             |
| <i>slit<sup>1</sup>, robo<sup>5</sup>, kuz<sup>H143</sup>/+, +, kuz<sup>e29</sup></i>  | 110 (10)                                         | ND                  | ND | ND  | 43                       | 100                                      | 48.9                                     | <i>P</i> <0.0001             |
| <b>B. Apterous axon crossing defects<sup>4</sup></b>                                   |                                                  |                     |    |     |                          |                                          |                                          |                              |
| Genotype                                                                               | Number of segments scored (embryos) <sup>1</sup> | Ap crossing defects |    |     | % of Ap crossing defects |                                          | Statistics (unpaired t-test)             |                              |
| <i>w<sup>1118</sup></i>                                                                | 96 (12)                                          | 0                   |    |     | 0                        |                                          | –                                        |                              |
| <i>kuz<sup>H143</sup>/+</i>                                                            | 104 (13)                                         | 20                  |    |     | 19.2                     |                                          | –                                        |                              |
| <i>slit<sup>2</sup>/+</i>                                                              | 120 (15)                                         | 20                  |    |     | 16.7                     |                                          | –                                        |                              |
| <i>slit<sup>2</sup>, +/ kuz<sup>H143</sup>, +</i>                                      | 288 (36)                                         | 117                 |    |     | 40.6                     |                                          | <i>P</i> <0.0001                         |                              |
| <i>slit<sup>2</sup>, +/ kuz<sup>2583</sup>, +</i>                                      | 224 (28)                                         | 92                  |    |     | 41.1                     |                                          | <i>P</i> <0.0001                         |                              |
| <i>slit<sup>2</sup>, +/ kuz<sup>H12</sup>, +</i>                                       | 360 (45)                                         | 112                 |    |     | 31.3                     |                                          | <i>P</i> <0.0001                         |                              |
| <i>UASKuzDN</i>                                                                        | 96 (12)                                          | 13                  |    |     | 13.5                     |                                          | –                                        |                              |
| <i>slit<sup>2</sup>/+;UASKuzDN</i>                                                     | 112 (14)                                         | 65                  |    |     | 58                       |                                          | <i>P</i> <0.0001                         |                              |
| <i>robo/+</i>                                                                          | 112 (14)                                         | 22                  |    |     | 19.6                     |                                          | –                                        |                              |
| <i>robo/+;UASKuzDN*</i>                                                                | 192 (24)                                         | 61                  |    |     | 31.8                     |                                          | <i>P</i> <0.05                           |                              |

Stage 16-17 embryos stained with anti-FasII MAb were scored as follows: +, thinner than normal fascicle ectopically crossing the midline; ++, normal fascicle ectopically crossing the midline; +++, thicker than normal fascicle ectopically crossing the midline.

<sup>1</sup>Eight abdominal and three thoracic segments were scored in each animal for a total of eleven segments.

<sup>2</sup>Percentage of FasII crossing defects is defined as total number of defects divided by segments scored.

<sup>3</sup>Percentage of FasII circling defects is defined as total number of defects divided by segments scored.

<sup>4</sup>Eight abdominal segments were scored in each embryo.

ND, not determined.
